# Supplementary material for: Hydrothermal fabrication of PbMoO4 microcrystals with exposed (001) facets and its enhanced photocatalytic properties
Source: Royal Society of Chemistry journal article supplement (doi:10.1039/c0ce00756k), 2011-01-01
Supplement: c0ce00756k.pdf [file c0ce00756k.pdf]

# Hydrothermal Fabrication of PbMoO<sub>4</sub> Microcrystals with Exposed (001) Facets and Its Enhanced Photocatalytic Properties

Min Shen,<sup>a,b</sup> Qinggang Zhang,<sup>b</sup> Hao Chen,<sup>\*a</sup> and Tianyou Peng<sup>\*b</sup>

<sup>a</sup> College of Science, Huazhong Agricultural University, Wuhan 430070, China

<sup>b</sup> College of Chemistry and Molecular Science, Wuhan University, Wuhan 430072, China

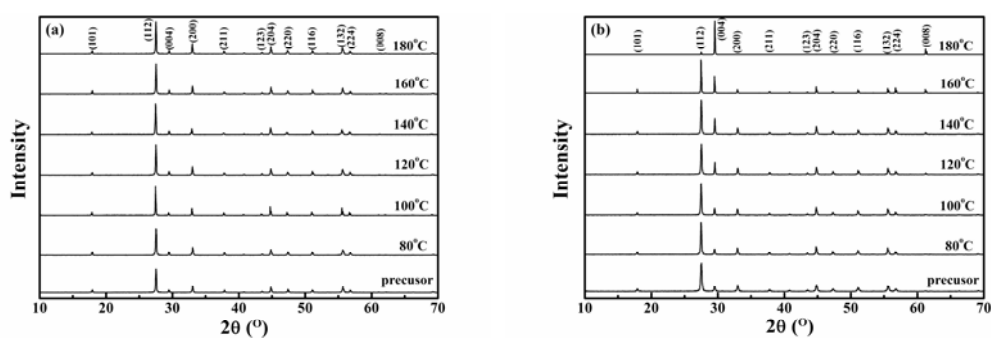

**Fig. S1** XRD patterns of PbMoO<sub>4</sub> derived from different hydrothermal temperatures for 24 h in the absence of CTAB (a) and in the presence of CTAB (b).

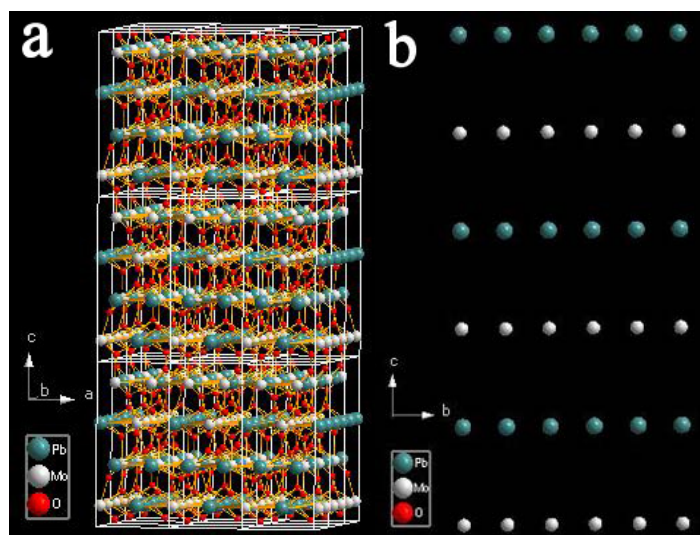

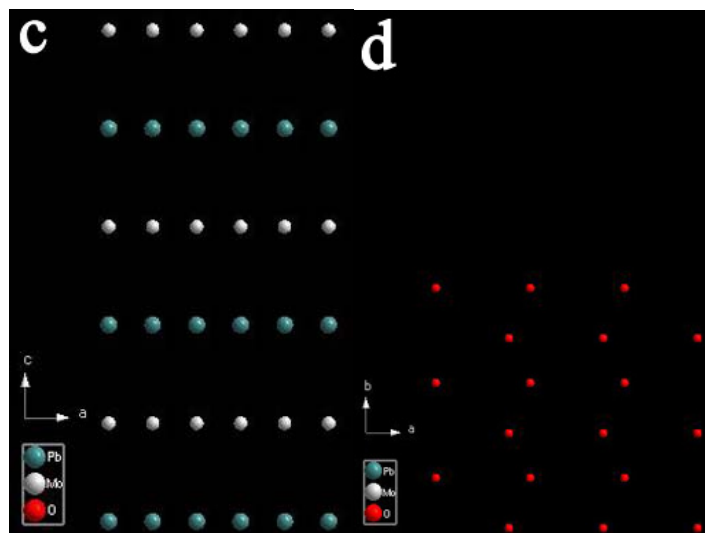

**Fig. S2** The structure model illustration of  $\text{PbMoO}_4$  ( $3 \times 3$  lattices) (a) and the surface atomic configurations in the (100) (b), (010) (c) and (001) (d) facets.

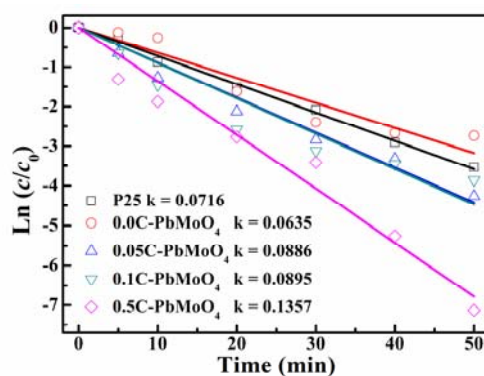

**Fig. S3** First-order plots for the photocatalytic degradation of RhB using various photocatalysts. (a): P25; (b): 0.0C- $\text{PbMoO}_4$ ; (c): 0.05C- $\text{PbMoO}_4$ ; (d): 0.1C- $\text{PbMoO}_4$ ; and (e): 0.5C- $\text{PbMoO}_4$ .
